# Supplementary material for: Cooperation between arbuscular mycorrhizal fungi and plant growth-promoting bacteria and their effects on plant growth and soil quality
Source: PeerJ. 2022 Mar 21;10:e13080. doi: 10.7717/peerj.13080 (PMC8944337; doi:10.7717/peerj.13080)
Supplement: Supplemental Information 1 [file peerj-10-13080-s001.xlsx]

## Sheet: Sheet1
处理	aboveground biomass	belowground biomass	Tatol Biomass	Root Length	RootSurfaceArea	RootAverageDiameter	Rvolume	Rootbranches	SIZE	R/S ratio	HEIGHT	NH4+-N	NO3-N	Total N	Total C	Available P	Total P	ALP	UE	EC	PH	PLANT P	PLANT N	PLANT C
CK1	1.06	0.41	1.47	275.16	749.58	9.06	166.63	1646.67	0.41	0.39	23.58	5.58	161.2	0.22	3.54	2.43	0.14	1948.56	108.97	461	7.5	0.0688263	2.28	42.48
1	1.28	0.49	1.77	270.68	756.69	9.81	177.53	1062	0.65	0.38	26.08	9.83	142.4	0.2	3.41	2.16	0.45	2016.59	120.66	325	8.37	0.0693685	1.91	42.39
1	1.94	0.55	2.49	334.46	852.31	8.15	174.32	1201.67	0.62	0.29	30.23	6.87	86.61	0.19	3.22	2.15	0.53	2424.77	114.56	336	8.37	0.0730622	2.04	42.3
1	1.8	0.74	2.54	363.16	824.37	7.76	157.95	1506.33	0.63	0.41	27.5	6.97	107.99	0.22	3.51	2.56	0.54	2065.18	455.75	326	8.29	0.0181898	2.27	42.9
1	2.07	0.47	2.54	424.98	879.61	6.63	145.54	1632.33	0.47	0.23	31.52	7.67	161.4	0.26	3.4	2.17	0.5	2599.7	108.97	299	8.26	0.0758007	2.14	42.6
1	1.71	0.71	2.42	242.92	655.5	9.03	145.08	829.67	0.66	0.41	27.43	5.64	73.17	0.21	3.54	2.09	0.45	1851.37	132.86	247	8.44	0.0635255	1.94	43.17
A2	3	1.45	4.45	682.25	924.27	4.19	96.97	5640.67	0.82	0.48	37.1	8.35	182.7	0.26	3.49	2.23	0.34	3017.59	468.97	305	8.22	0.0175278	2.01	42.94
2	3	1.5	4.5	682.09	842.44	4.1	87.15	6155	0.81	0.5	28.83	8.01	107.53	0.22	3.57	2.39	0.49	3007.88	392.69	267	8.42	0.0214418	1.85	43.41
2	2.65	1.28	3.93	652.48	934.03	4.65	108.56	3510.67	0.8	0.48	33.17	8.42	83.75	0.21	3.4	2.05	0.46	2949.56	352.02	297	8.35	0.0237202	2.05	42.76
2	2.71	1.08	3.79	573.57	922.97	5.55	128.53	2891	1.08	0.4	34.92	8.56	41.67	0.22	3.42	2.31	0.49	2142.93	360.15	236	8.43	0.0234069	1.98	43.03
2	3.11	1.26	4.37	483.93	769.87	5.05	97.79	2097.67	0.87	0.4	35.17	7.76	107.37	0.23	3.38	2.21	0.53	2036.03	340.32	260	8.37	0.0245945	1.74	42.29
2	2.38	1.09	3.47	590.92	908.33	4.93	112.62	4669.67	0.73	0.46	35.13	6.94	60.36	0.22	3.45	2.07	0.49	2570.54	442.02	248	8.49	0.0192073	2.22	43.33
B3	1.68	0.78	2.46	531.38	900.35	5.51	124.17	2033	0.66	0.46	30.5	10.77	71.9	0.2	3.57	1.97	0.5	2580.26	191.85	238	8.49	0.0442533	1.84	43.08
3	1.78	0.98	2.76	568.62	908.13	5.1	116.96	3800	0.61	0.55	30.38	8.34	65.29	0.19	3.46	2.07	0.53	2191.52	314.39	254	8.47	0.0269411	1.84	43.13
3	1.63	0.68	2.31	329.58	864.79	8.37	180.7	1205.33	0.76	0.41	27.43	8	79.29	0.19	3.39	2.17	0.48	1870.81	192.36	298	8.44	0.0438761	1.9	42.49
3	1.66	0.65	2.31	331.15	788.11	7.79	154.79	2615	0.75	0.39	28.83	6.56	69.75	0.2	3.4	2.29	0.49	1997.15	126.25	257	8.47	0.0670891	2.17	42.16
3	1.58	0.61	2.19	480.38	812.36	5.46	110.14	2111	0.62	0.39	26.5	7.38	92.7	0.2	3.42	2.15	0.4	2278.99	140.49	284	8.37	0.0595772	2.2	42.46
3	1.69	0.78	2.47	439.8	1008.46	7.58	191.56	1828	0.76	0.46	30.83	6.74	110.28	0.21	3.39	2.11	0.5	2473.36	201.51	262	8.36	0.0414868	1.88	42.57
5	3.04	1.8	4.84	548.17	876.15	5.11	111.75	2795.67	0.84	0.59	39.58	8.36	48.84	0.21	3.5	2.39	0.46	3124.5	310.47	209	8.44	0.0271846	1.9	43.2
5	3.68	1.06	4.74	719.72	862.62	3.83	82.78	3750.33	0.91	0.29	39.5	8.24	34	0.22	3.5	2.43	0.49	3075.9	280.98	169	8.48	0.0301801	1.78	41.64
5	3	1.48	4.48	671.82	930.42	4.42	102.9	3251	0.91	0.49	34.3	7.8	59.25	0.21	3.47	2.19	0.47	2794.07	292.17	224	8.45	0.0289215	2.28	43.16
5	2.59	1.59	4.18	759.05	784.84	3.5	68.63	3742.33	0.83	0.61	32.42	10.74	58.11	0.2	3.51	5.83	0.47	3105.06	299.29	205	8.48	0.0283337	1.89	43.02
AB5	3.45	1.68	5.13	892	886.52	3.3	73.72	4783.33	0.87	0.49	40.42	8.96	33.3	0.22	3.38	2.15	0.48	2726.04	294.2	211	8.43	0.028654	1.87	42.08
5	3.19	1.9	5.09	685.45	818.73	3.81	78.14	3451.33	0.79	0.6	36.92	11.32	42.53	0.22	3.45	2.15	0.45	2570.54	223.02	240	8.43	0.0377993	1.62	42.71
